# Supplementary material for: Neighborhood Preference of Amino Acids in Protein Structures and its Applications in Protein Structure Assessment
Source: PubMed Central journal article supplement (PMC7062742; doi:10.1038/s41598-020-61205-w), 2020-03-09
Supplement: 41598_2020_61205_MOESM1_ESM.pdf [file 41598_2020_61205_MOESM1_ESM.pdf]

# Neighborhood Preference of Amino Acids in Protein Structures and its Applications in Protein Structure Assessment

Siyuan Liu<sup>1,2</sup>, Xilun Xiang<sup>1,2</sup>, Xiang Gao<sup>1,2</sup>, Haiguang Liu<sup>1,\*</sup>

<sup>1</sup> Complex Systems Division, Beijing Computational Science Research Center, Beijing, 100193, China

<sup>2</sup> School of Software Engineering, University of Science and Technology of China, Hefei, Anhui, 230026 China

## Supplementary Information

This supplementary material contains the following information to support the main text:

### 1. The size distributions of 20 residues (Figure S1).

### 2. The angle parameter discretization at four levels (N=15,20,25,30):

- Figure S2 shows the performance on the Modeller dataset evaluation (using NEPRE-F with cutoff=6Å).
- Figure S3 shows the statistics of un-sampled sections.
- The performance in recognizing native structures is summarized in Table S1 for the four discretization schemes.

**3. The structure assessment performance comparison with other methods.** A representative decoy set (**1BYIA**) was used to show the correlation between scores(energies) and the RMSD values with respect to native structure (Figure S4).

**4. The performance comparison on CASP12 dataset with other methods** (Figure S5,S6,S7).

### 5. The comparison for intra-chain and inter-chain neighborhood preferences.

The Jensen-Shannon divergence ( $D_{JS}$ ) was used to measure the difference between the two distributions (intra- or inter- chain) for the neighboring case between any two amino acids.

Where  $D_{JS}$  is defined as:

$$D_{JS}(p||q) = \frac{1}{2}D_{KL}\left(p\left|\left|\frac{p+q}{2}\right.\right.\right) + \frac{1}{2}D_{KL}\left(q\left|\left|\frac{p+q}{2}\right.\right.\right)$$

And  $D_{KL}$  is the Kullback-Leibler divergence:

$$D_{KL}(p||q) = \sum_x p(x) \log\left(\frac{p(x)}{q(x)}\right)$$

Here, the  $p(x)$  and  $q(x)$  are the two distribution functions in the parameter space  $\{x\}$ .

Because  $D_{JS}$  is symmetric and bounded to  $[0,1]$  (for the base 2 logarithm), we used  $D_{JS}$  to measure the differences between the two distributions. The  $D_{JS}$  for 20x20 pairs of amino acids were summarized in Figure S8.

## 6. The decoy datasets:

- The simulation decoy datasets are available from Zhanglab at <https://zhanglab.ccmb.med.umich.edu/decoys/>
- The CASP12 decoy sets used in this study are uploaded to Github at: [https://github.com/TangYuan-Liu/NEPRE\\_dataset\\_used](https://github.com/TangYuan-Liu/NEPRE_dataset_used)

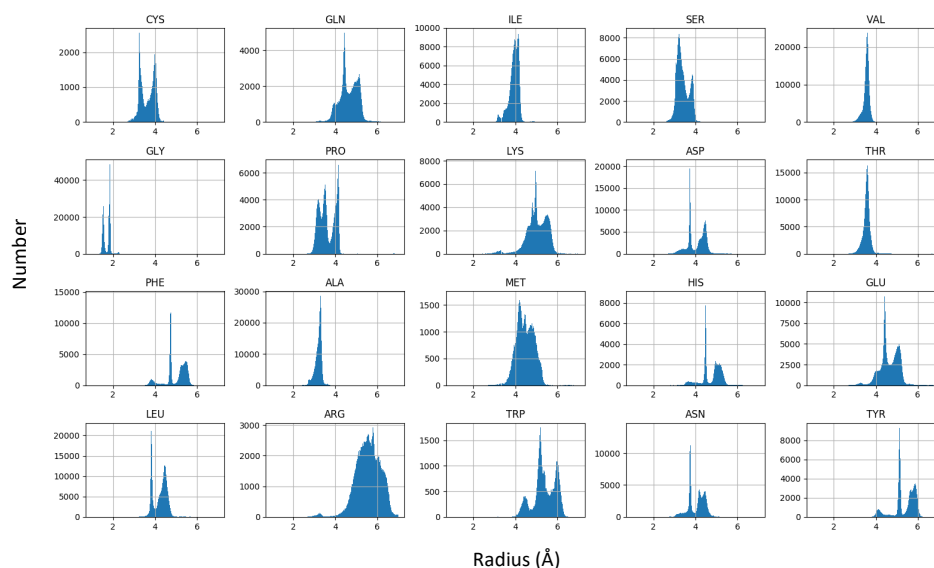

**Figure S1. Distributions of amino acid radius.** The statistics are based on the dataset composed of 14,647 high-resolution protein structures (BLAST  $p < 10^{-7}$ ). The radius (in Å) is defined as the largest distance between any atom and the geometry center of the amino acid. Each distribution is fitted using a Gaussian function, and the mean values are used as the characteristic radius for that amino acid.

**Figure S2. The NEPRE-F performance on the Modeller dataset with four discretization schemes for the angle parameter space** (next page). The  $\theta [0,\pi]$  and  $\varphi [0,2*\pi]$  space was divided to 15x15, 20x20, 25x25, or 30x30 sections to describe the orientation dependent energy functions (see equation 4 in the main text). 20 decoy sets in the Modeller dataset were evaluated using each discretization scheme, and calculated energies were plotted against the RMSD values with respect to their native structures. The results suggest that the discretization scheme of 20x20 is sufficient for accurate assessment. The RMSD was in Å, and the energy is in the unit of  $kT$ .

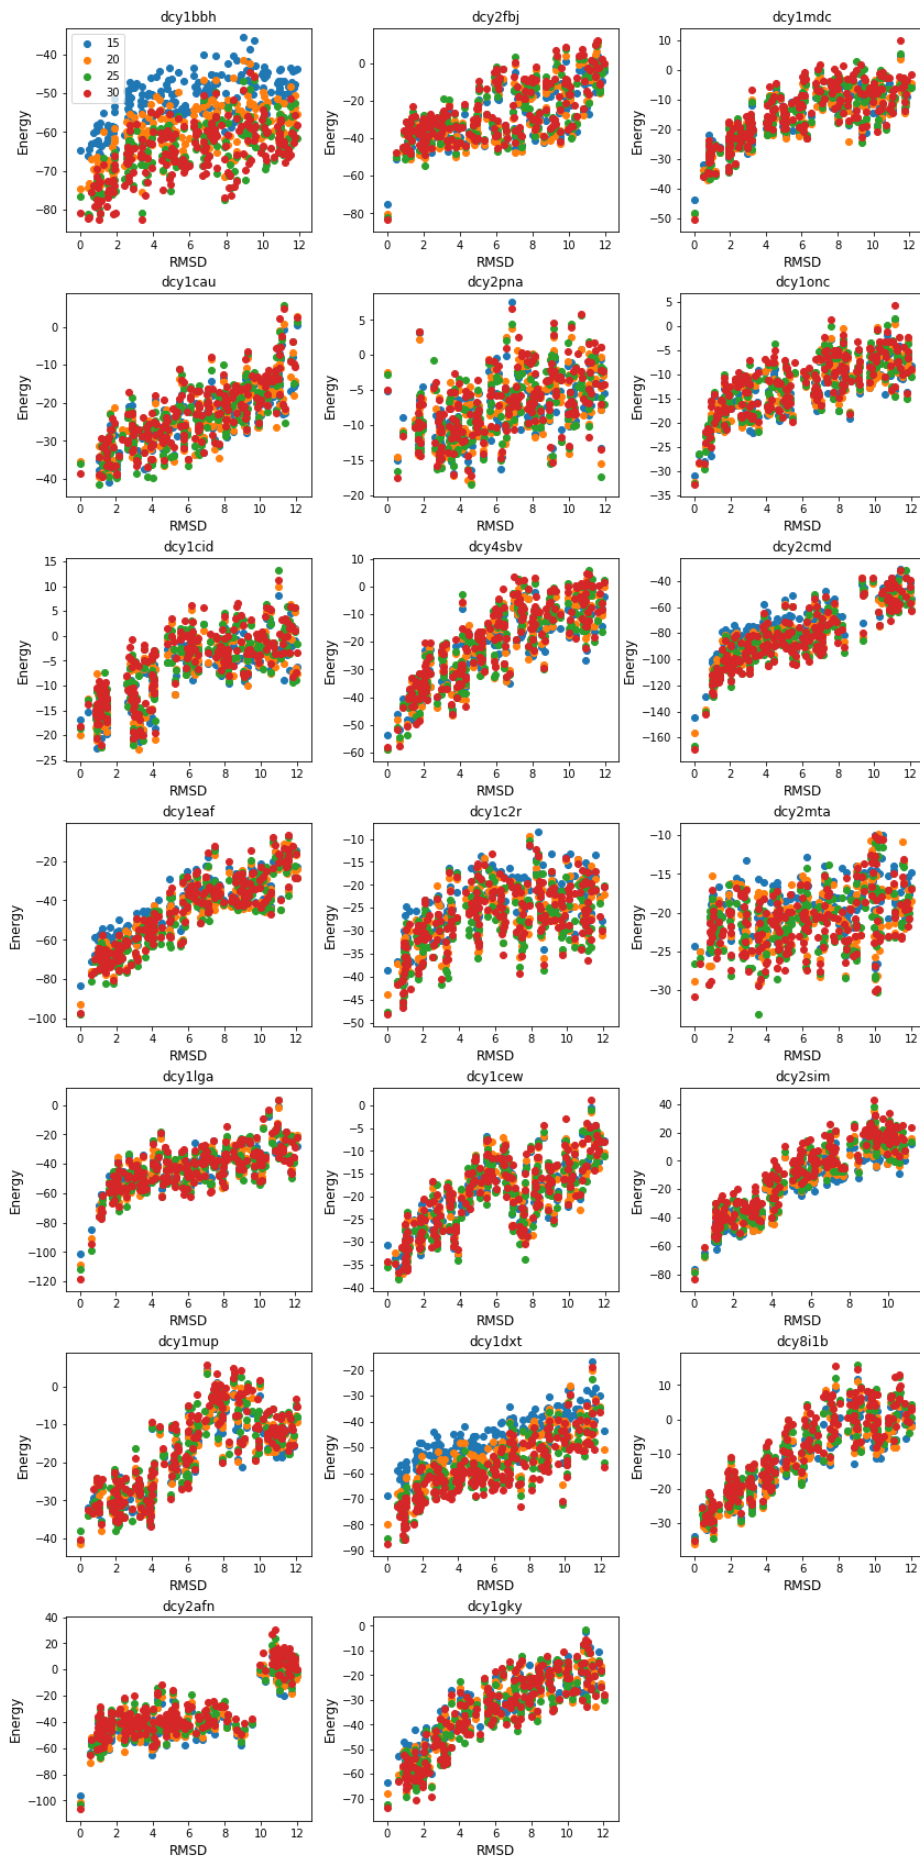

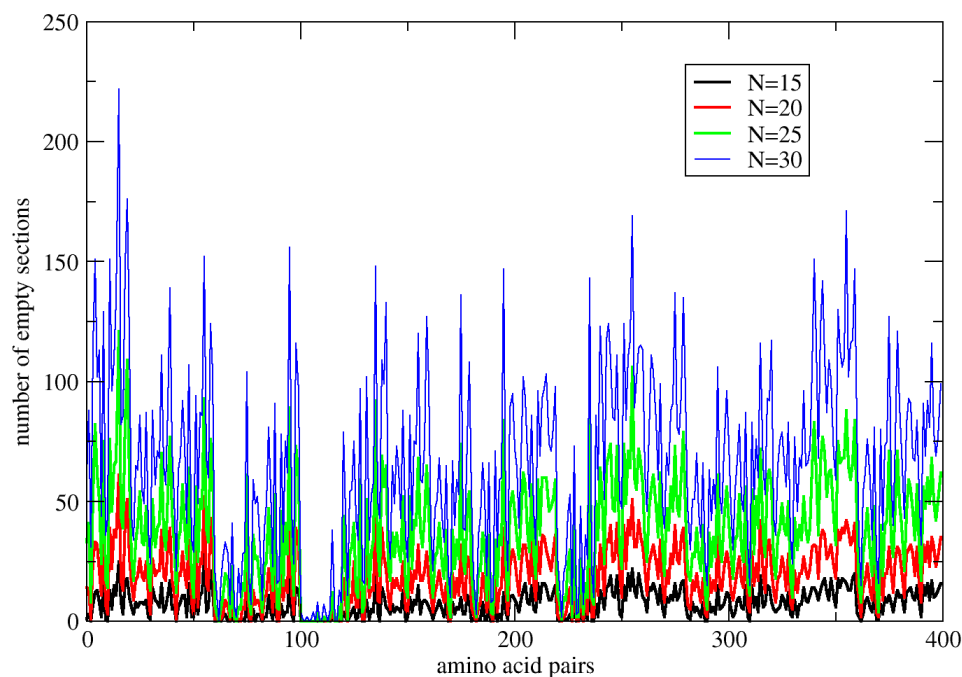

**Figure S3. The statistics of un-sampled sections for four discretization schemes.**

The number of un-sampled sections for all pairs of amino acids. Finer discretization resulted more un-sampled sections. With  $N=20$  (400 sections), the un-sampled sections are fewer than 18.8 on average (red curve) for all amino acid pairs. In terms of percentage, the un-sampled regions are 3.2%, 4.6%, 6.0%, 7.3% for  $N=15,20,25,30$ . We choose a discretization scheme with  $N=20$  to balance the function accuracy and statistical significance. For un-sampled sections, the probability is 0, corresponding to infinite high energy according to Boltzmann relation. To avoid such singularities, bi-linear interpolation in the potential energy space was carried out for those regions.

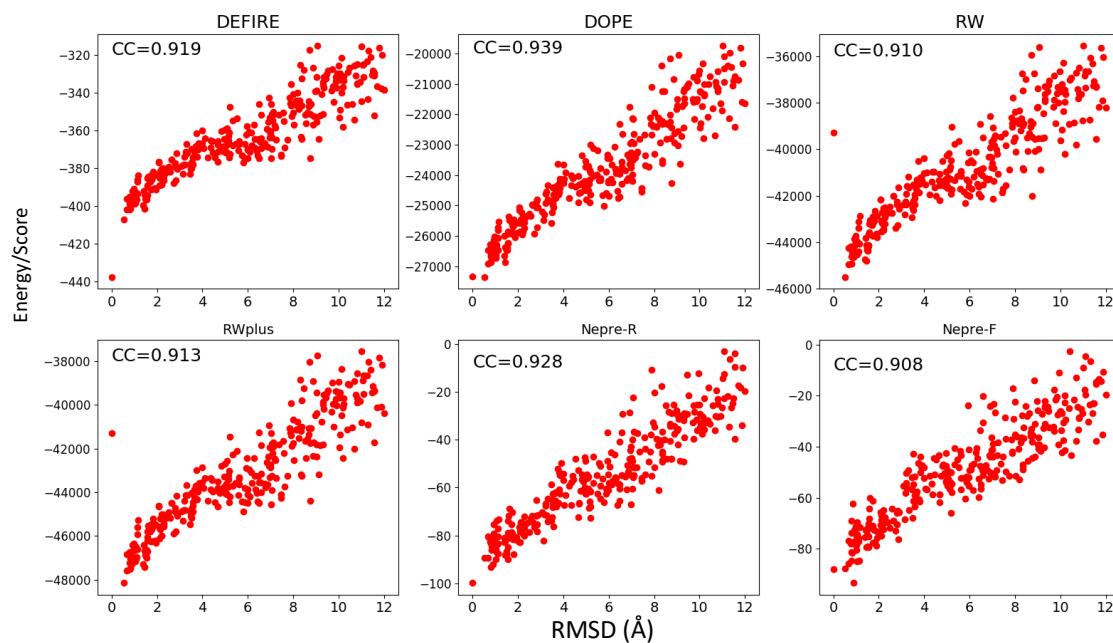

**Figure S4.** The correlation between energy function and the structure difference compared to native state (measured using RMSD) for decoy set 1BYIA in I-TASSER(b). The energies calculated using these 6 methods have strong positive correlations to the structure qualities (RMSD values).

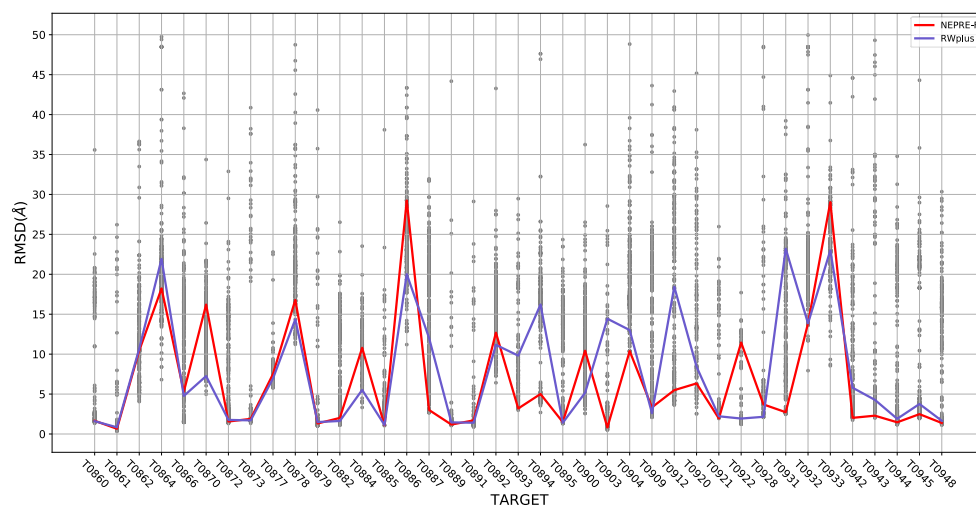

**Figure S5.** The performance of NEPRE-F compared to RWplus on the CASP12 dataset. The dots are the distributions of RMSD of decoy structures with respect to their native structure. The lines indicate the identified structures with the lowest energies.

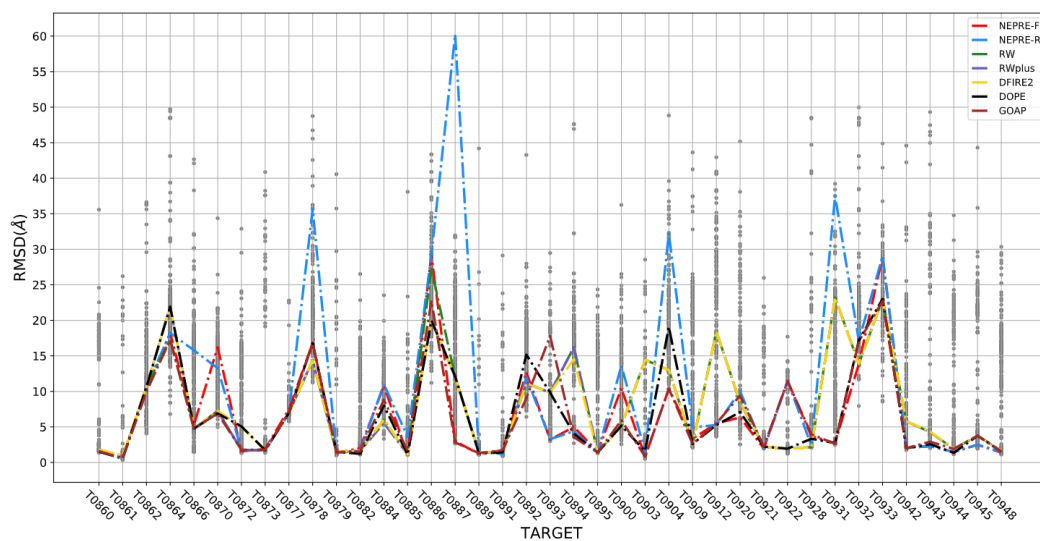

**Figure S6. The performance comparison using CASP12 dataset for six methods.** The colored lines show the selected model with the lowest energies. The RMSD was calculated with respect to the native structure solved using crystallography method.

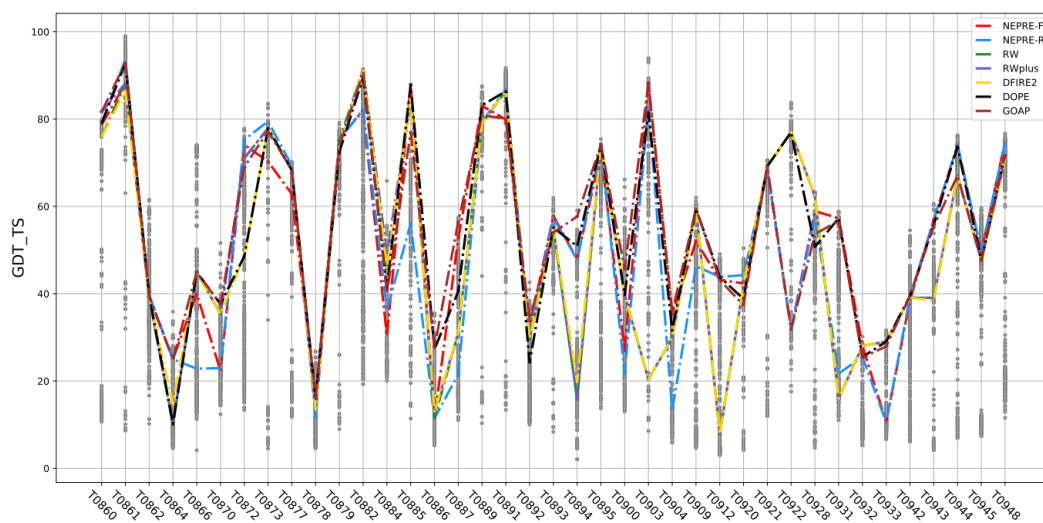

**Figure S7. The performance comparison of six methods.** The plot scheme is the same as Figure S6, except that the RMSD is replaced with the GDT\_TS scores, which evaluate the similarity to the native structure..

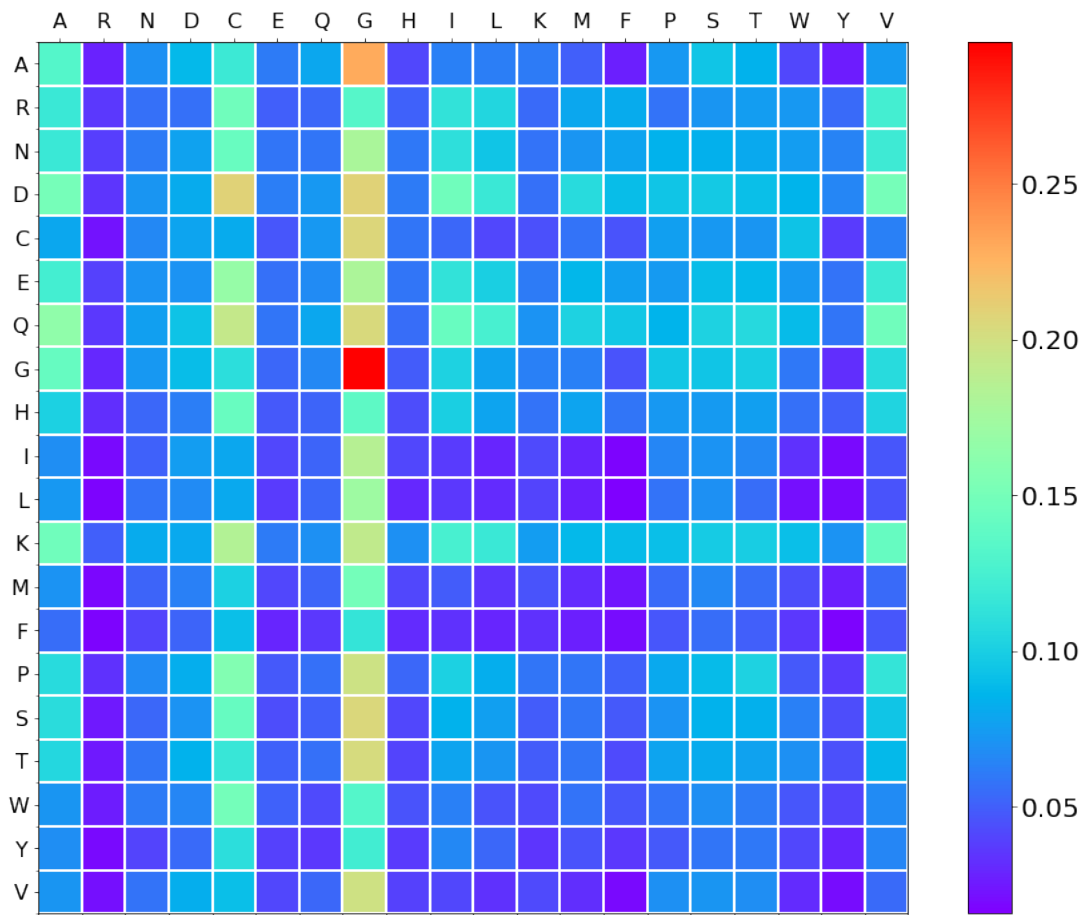

**Figure S8. The comparison of neighborhood preferences derived from single chain protein structures and that from protein complex interfaces.** The Jensen-Shannon Divergence was used to measure the difference between the two distributions for each pair of amino acids (in the unit of bit, since the *base 2 logarithm* was used in the calculation). Each row summarizes the neighborhoods centered at a particular amino acid type; and each entry in a row corresponds to a neighboring amino acid distributed around the centered amino acid. The columns for alanine, cysteine, glycine and valine reveal large differences in the neighborhood preferences; the divergences are small in other cases, indicating similar preferences.

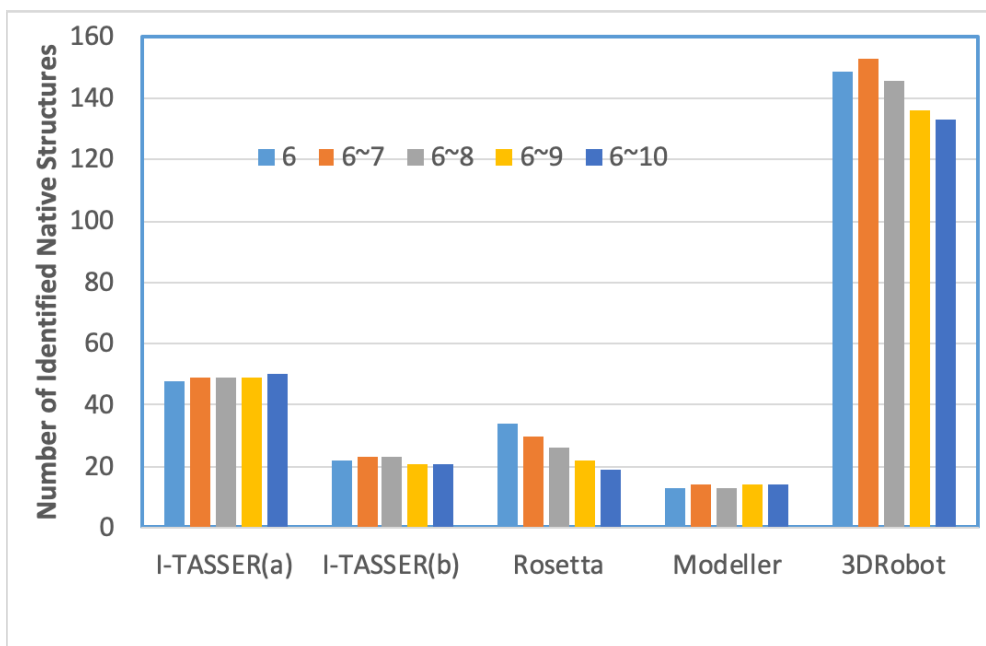

**Figure S9. The performance of multilayer NEPRE in identifying native structures.** The layer information (the numbers indicate the cutoff distances, in Å) is shown in legends. Each column shows the number of identified native structures.



**Table S1. The numbers of identified native structures using four discretization schemes for angle parameter space.**

| Number of Grids(N) |               | 15 | 20 | 25 | 30 |
|--------------------|---------------|----|----|----|----|
| (20 decoy sets)    | Modeller Top1 | 13 | 13 | 13 | 15 |
|                    | Top5          | 14 | 16 | 15 | 16 |
|                    | Top10         | 15 | 18 | 17 | 19 |

The results presented in the main text was obtained with N=20.

**Table S2. The performance of NEPRE with multilayer potential energies.**

| <b>Layer (6,7)<sup>#</sup></b> |                |                    |                    |                |                 |
|--------------------------------|----------------|--------------------|--------------------|----------------|-----------------|
|                                | <b>3DRobot</b> | <b>I-TASSER(a)</b> | <b>I-TASSER(b)</b> | <b>Rosetta</b> | <b>Modeller</b> |
| <b>top1</b>                    | 153            | 49                 | 23                 | 30             | 14              |
| <b>top5</b>                    | 177            | 49                 | 32                 | 50             | 16              |
| <b>top10</b>                   | 183            | 49                 | 36                 | 52             | 16              |
| <b>Layer (6, 7, 8)</b>         |                |                    |                    |                |                 |
|                                | <b>3DRobot</b> | <b>I-TASSER(a)</b> | <b>I-TASSER(b)</b> | <b>Rosetta</b> | <b>Modeller</b> |
| <b>top1</b>                    | 146            | 49                 | 23                 | 26             | 13              |
| <b>top5</b>                    | 174            | 49                 | 34                 | 50             | 15              |
| <b>top10</b>                   | 183            | 49                 | 38                 | 52             | 15              |
| <b>Layer (6, 7, 8, 9)</b>      |                |                    |                    |                |                 |
|                                | <b>3DRobot</b> | <b>I-TASSER(a)</b> | <b>I-TASSER(b)</b> | <b>Rosetta</b> | <b>Modeller</b> |
| <b>top1</b>                    | 136            | 49                 | 21                 | 22             | 14              |
| <b>top5</b>                    | 164            | 49                 | 30                 | 49             | 16              |
| <b>top10</b>                   | 175            | 49                 | 36                 | 53             | 16              |
| <b>Layer(6, 7, 8, 9, 10)</b>   |                |                    |                    |                |                 |
|                                | <b>3DRobot</b> | <b>I-TASSER(a)</b> | <b>I-TASSER(b)</b> | <b>Rosetta</b> | <b>Modeller</b> |
| <b>top1</b>                    | 133            | 50                 | 21                 | 19             | 14              |
| <b>top5</b>                    | 158            | 50                 | 30                 | 47             | 17              |
| <b>top10</b>                   | 169            | 50                 | 37                 | 50             | 17              |

<sup>#</sup> The decoy models were ranked using the total energy:  $E_{tot} = \sum_{i \in \{layer\}} E_i$  where  $E_i$  is the potential energy function derived from the layer  $i$ . The other fields are the same as Table 4 in the main text.
